# Supplementary material for: A chiral metallacyclophane for asymmetric catalysisElectonic supplementary information (ESI) available: experimental details and analytical data for 2 and 3, and general procedure for analysis. See http://www.rsc.org/suppdata/cc/b2/b208324h/
Source: Royal Society of Chemistry journal article supplement (doi:10.1039/b208324h), 2002-12-03
Supplement: b208324h.doc [file b208324h.doc]

Supporting Information for

A Chiral Metallacyclophane for Asymmetric Catalysis

Hua Jiang, Aiguo Hu, and Wenbin Lin*

Department of Chemistry, CB#3290, University of North Carolina, Chapel Hill, North Carolina 27599, [wlin@unc.edu](mailto:wlin@unc.edu)

**Experimental Section.**

**Materials and General Procedures.** All of the chemicals were obtained from commercial sources and used without further purification. All of the reactions and manipulations were carried out under N2 or Ar with the use of standard inert atmosphere and Schlenk techniques. Solvents used in the reactions were dried by standard procedures. UV-Visible spectra were obtained using Shimadzu UV-2410PC spectrophotometer. Circular dichroism (CD) spectra were recorded on a Jasco J-720 spectropolarimeter. The IR spectra were recorded from KBr pellets on a Nicolet Magna-560 FT-IR spectrometer. NMR spectra were recorded on Bruker NMR 400 DRX spetrometer. 1H-NMR spectra were recorded at 400 MHz and referenced to the proton resonance resulting from incomplete deuteration of the deuterated chloroform ( 7.26). 13C{1H} NMR spectra were recorded at 100 MHz, and all of the chemical shifts are reported downfield in ppm relative to the carbon resonance of deuterated chloroform ( 77.0).

**Synthesis.**

**6,6’-Dibromo-2,2’-diacetyl-1,1’-binaphthalene.**  A solution of 6,6’-dibromo-2,2-dihydroxy-1,1’-binaphthalene(4.44 g, 10 mmol)in dichloromethane (60 ml), acetic anhydride (4.7 mL, 50 mmol), and pyridine (4.0 mL, 50 mmol) was stirred at r.t. for 24 h. The product was extracted with dichloromethane and washed with water, and the organic layer was dried over anhydrous MgSO4. Removal of organic volatiles gave pure 6,6’-dibromo-2,2’-diacetyl-1,1’-binaphthalene as light yellow solid (5.25 g, 99%). 1H NMR (CDCl3):  8.10 (d, 4JH-H = 1.8 Hz, 2H, H5), 7.91 (d, 3JH-H = 9.2 Hz, 2H, H3), 7.4 (d, 3JH-H = 9.2 Hz, 2H, H4), 7.35 (dd, 3JH-H = 9.2 Hz, 4JH-H = 1.8 Hz, 2H, H7), 7.0 (d, 3JH-H = 9.2 Hz, 2H, H8), 1.88 (s, 6H, CO2*CH3*).

**2,2’-Diethoxy-6,6’-diethynyl-1,1’-binaphthalene (L1):** To a degassed solution of 6,6’-dibromo-2,2’-diethoxy-1,1’-binaphthalene (1.0 g, 2.0 mmol) and Pd(PPh3)2Cl2 (142 mg, 0.2 mmol) in benzene (10 mL) and triethyl amine (12 mL) was added trimethylsilylacetylene (3.5 ml, 25 mmol) and CuI (76 mg, 0.4 mmol). After heated to reflux for 2 days, the reaction mixture was cooled to room temperature. The solid was filtered off and the filtrate was evaporated to dryness. The residue was dissolved in the THF (15 mL) and methanol (15 mL) and to this solution was added K2CO3 (608 mg, 4.4 mmol). After stirred for ~1 h, the product was extracted with dichloromethane and washed with water. The organic layer was dried over anhydrous MgSO4, and solvents were evaporated in vacuo. The crude product was purified by silica gel column chromatography with ethyl acetate/hexane (1:5 v/v) to give light yellow solid of **L1** (730 mg, 90 %). 1H NMR (CDCl3) 8.04 (d, 4J = 1.5 Hz, 2 H), 7.90 (d, 3J = 9.3 Hz, 2 H), 7.42 (d, 3J = 9.3 Hz, 2 H), 7.25 (dd, 3J = 8.8 Hz, 4J = 1.5 Hz, 2 H), 7.04 (d, 3J = 8.8 Hz, 2 H), 4.05 (m, 4 H), 3.08 (s, 2 H), 1.06 (t, 6 H). IR: (-CC-H) 3277 cm–1 (s); (-CC-), 2101 cm–1 (w).

**2,2’-dihydroxy-6,6'-Diethynyl--1,1’-binaphthalene (L3)**. To a degassed solution of 6,6’-dibromo-2,2’-diacetyl-1,1’-binaphthalene (2.64 g, 5 mmol) and Pd(PPh3)2Cl2 (355 mg, 0.5 mmol) in benzene (25 mL) and triethyl amine (30 mL) was added trimethylsilylacetylene (9 ml, 64 mmol) and CuI (190 mg, 1 mmol). After heated to reflux for 2 days, the reaction mixture was cooled to room temperature. The solid was filtered off and the filtrate was evaporated to dryness. The residue was dissolved in tetrahydrofuran (40 mL) and methanol (40 mL), followed by the addition of 2M of aqueous sodium hydroxide solution (10 mL). After stirred for ~1h, the product was extracted with dichloromethane and washed with water. The organic layer was dried over anhydrous MgSO4, and the organic volatiles were evaporated in vacuo. The crude product was purified by flash chromatography with ethyl acetate/hexane (1:5 v/v) to afford light yellow solid of **L3** (1.58 g, 95 %). 1H NMR (CDCl3) 8.05 (d, 4J = 1.5 Hz, 2 H), 7.92 (d, 3J = 9.1 Hz, 2 H), 7.38 (d, 3J = 9.1 Hz, 2 H), 7.34 (dd, 3J = 8.7 Hz, 4J = 1.5 Hz, 2 H), 7.04 (d, 3J = 8.7 Hz, 2 H), 3.11 (s, 2 H). IR: (-CC-H) 3279 cm–1 (s); (-CC-) 2101 cm-1 (w).

**2,2’-diacetyl-6,6’-diethynyl-1,1’-binaphthalene (L2):** A solution of **L2** (1.67 g, 2.0 mmol)in dichloromethane (30 mL), acetic anhydride (2.4 mL, 10 mmol), and pyridine (2.1 mL, 10 mmol) was stirred at r.t. for 24 h. The product was extracted with dichloromethane and washed with water. The organic layer was dried over anhydrous MgSO4. After evaporation of organic volatiles, the residue was purified by flash column chromatography with an eluent of ethyl acetate/hexane (1:10 v/v) to give light yellow solid of **L2** (1.99 g, 95%). 1H NMR (CDCl3): 8.11 (d, 4J = 1.9 Hz, 2 H), 7.96 (d, 3J = 8.8 Hz, 2 H), 7.44 (d, 3J = 8.8 Hz, 2 H), 7.34 (dd, 3J = 8.7 Hz, 4J = 1.9 Hz, 2 H), 7.10 (d, 3J = 8.7 Hz, 2 H), 3.14 (s, 2 H), 1.87 (s, 6 H). 13C{1H} NMR (CDCl3):  169.05, 147.62, 132.89, 132.31, 130.97, 129.58, 129.51, 126.14, 123.16, 122.73, 119.57, 83.51, 77.93, 20.47. IR: (-CC-H) 3304 cm-1 (s), 3272cm-1 (s); (-CC-) 2104 cm-1 (w); (-C=O) 1765 cm-1 (s).

**[*cis-*Pt(PEt3)2(L1)2]2 (1):** To a solution of **L1** (19.5 mg, 0.05mmol) and *cis-*Pt(PEt3)2Cl2 (25.1 mg, 0.05 mmol) in diethylamine (12 mL) was added CuCl (1 mg, 0.01 mmol). After stirred at r.t. for overnight, dichloromethane and water was added to extract the product. The organic layer was dried over anhydrous MgSO4 and the organic volatiles were removed in vacuo. The residue was purified by flash chromatography with an eluent of hexane/ethyl acetate/dichloromethane (4:1:1 v/v/v) to give light yellow solid of **1** (20 mg, 49%). 1H NMR (CDCl3):  7.73 (m, 8H), 7.27 (m, 8H), 6.82 (d, 3J = 8.8Hz, 4H), 3.96 (m, 8H), 2.08 (m, 24H), 1.17(m, 36H), 1.05 (m, 12H). 13C{1H} NMR (CDCl3): 53.95, 132.36, 130.94, 129.18, 128.79, 128.105, 124.72, 123.74, 121.12, 115.99, 107.3 (t, 3JP-C = 16.2 Hz), 105.0 (dd, 2J*trans-*P-C = 143.2 Hz, 2J*cis-*P-C = 21.6 Hz), 17.29(m), 15.15, 8.48. 31P{1H} NMR (CDCl3): 3.67 (1J (P-Pt) = 2252Hz). HR-MS (FAB) m/z [M + H]+ 1639.59461 (Calcd m/z 1639.59456). Anal. Calcd for C80H100O4P4Pt23C6H14: C, 62.01; H, 7.54. Found: 62.30; H 7.42. IR: (-CC-), 2106 cm -1 (m).

**[*cis-*Pt(PEt3)2(L2)2]2 (2):** To a solution of **L2** (20.9 mg, 0.05mmol) and *cis-*Pt(PEt3)2Cl2 (25.1 mg, 0.05 mmol) in dichloromethane (120 mL) and diethylamine (0.5 mL) was added CuCl (1 mg, 0.01 mmol). After stirred at r.t. for overnight, dichloromethane and water were added to extract the product. The Organic layer was dried over anhydrous MgSO4. After the solvents were evaporated, the residue was purified by flash column chromatography with an eluent of hexane/ethyl acetate/dichloromethane (3:1:1 v/v/v) to give light yellow solid of **2** (25 mg, 59%). 1H NMR (CDCl3):  7.79 (d, 3J = 7.7Hz, 4H), 7.78 (s, 4H), 7.35 (d, 3J = 8.2Hz, 4H), 7.28 (d, 3J = 9.5Hz, 4H), 6.88 (d, 3J = 8.2Hz, 4H), 2.09 (m, 24H), 1.91 (s, 12H), 1.18 (m, 36H). 13C{1H} NMR (CDCl3): 169.5, 146.0, 131.42, 131.38, 131.34, 129.0, 128.5, 126.0, 125.4, 123.2, 121.3, 106.8 (t, 3JP-C = 16.2 Hz), 106.0 (dd, 2J*trans-*P-C = 143.8 Hz, 2J*cis-*P-C = 21.2 Hz), 20.68, 17.26 (m), 8.46.  31P{1H} NMR (CDCl3) (vs 85% H3PO4): 2.95 (JP-Pt = 2252Hz). HR-MS (FAB) m/z [M + H]+ 1695.5114 (Calcd m/z 1695.5116). Anal. Calcd for C80H92O8P4Pt2, **2**: C, 56.67; H, 5.47. Found: 56.20; H 5.66. IR: (-CC-) 2107 cm–1 (m); (-C=O) 1759 cm–1 (s).

**[*cis-*Pt(PEt3)2(L3)2]2 (3):** A mixture of **2** (25 mg, 0.0147 mmol)in THF (15 mL) and methanol (15 mL) and K2CO3 (20 mg, 0.145 mmol) was stirred at room temperature for ~2 h. Dichloromethane and water were added to extract the product. The Organic layer was dried over anhydrous MgSO4. After the solvents were evaporated, the residue was purified by flash column chromatography with an eluent of hexane/ethyl acetate/dichloromethane (2:1:1 v/v/v) to give light yellow solid of **3** (23 mg, 99%). 1H NMR (CDCl3):  7.78 (d, 3J =9.1Hz, 4 H), 7.75 (s, 4H), 7.35 (d, 3J =8.7Hz, 4 H), 7.26 (d, 3J =9.3Hz, 4 H), 6.83 (d, 3J =8.9Hz, 4 H), 5.02(broad, 4 H, -OH), 2.08 (m, 24 H), 1.17 (m, 36 H). 13C{1H} NMR (CDCl3):  151.9, 132.0,131.7, 130.6, 129.21, 129.19, 124.2, 123.7, 117.2, 111.0, 106.9 (d, 3JP-C = 16.2 Hz), 105.0 (dd, 2J*trans-*P-C = 143.6 Hz, 2J*cis-*P-C = 21.2 Hz), 17.23 (m), 8.46. 31P{1H} NMR (CDCl3): 3.55 [1J (P-Pt) = 2255Hz]. HR-MS (FAB) m/z [M + H]+ 1527.4696 (Calcd m/z 1527.4694). Anal. Calcd for C72H84O4P4Pt2, **3**: C, 56.61; H, 5.54. Found: 56.32; H 5.52. IR: (-CC-) 2109 cm-1 (m).

**General procedure for catalysis:** To a schlenk flask were added compound **3** (7.6 mg, 5 mol), 1 mL of CH2Cl2 and Ti(OiPr)4 (60 L, 200 mol) under Ar atomosphere. After stirring for 10 min, ZnEt2 in toluene (0.15 mL, 1.1 M, 165 mol) and aldehyde (50 mol) were added to the reaction mixture. After 16 h at r.t. (or 40 h at 0 oC), the reaction was quenched with 0.5 mL of MeOH, and internal standard was added. Conversion was determined with NMR by comparing the internal standard and corresponding aldehyde peaks, and e.e.’s were determined by Chiral Capillary GC.

**Conditions for e.e. determinations of chiral secondary alcohols from diethylzinc additions**. Chiral Capillary GC: Supelco -Dex 120 column 30 m x 0.25 mm (i.d.), 0.25 m film. Carrier gas: He (1.0 mL/min). Detector: FID, 250 oC. Injecter: 220 oC

Racemic alcohols were obtained by diethylzinc additions of aldehydes using (*rac*-)BINOL and Ti(OiPr)4 as catalyst.1 The retention times of theses racemic alcohol products under the given conditions are listed below.

**1-Phenyl-1-propanol:** *t*R = 28.65 min, *t*s = 29.33 min (100 to 140 oC, 1 oC/min).

**1-(*p*-Methylphenyl)-1-propanol:** *t*R = 35.23 min, *t*s = 36.28 min (100 to 150 oC, 1 oC/min).

**1-(*p*-Chlorophenyl)-1-propanol:** *t*R = 32.50 min, *t*s = 33.43 min (120 to 160 oC, 1 oC/min).

**1-(*p*-Bromophenyl)-1-propanol:** *t*R = 45.68 min, *t*s = 46.90 min (140 oC).

**1-(*p*-Florophenyl)-1-propanol:** *t*R = 22.75 min, *t*s = 23.85 min (110 oC to 140 oC, 1 oC/min).

**1-(-Naphthyl)-1-propanol:** *t*R = 38.45 min, *t*s = 38.95 min (150 to 180 oC, 1 oC/min, hold for 20 min at 180 oC).

1. F.Y. Zhang, C.W. Yip, R. Cao, A.S.C. Chan, *Tetrahedron: Asymmetry*. **1997**, 8, 585-589.

7.00

7.40

7.80

8.20

L1

L2

L3

~

6.4

6.8

7.2

7.6

8.0

1

2

3

Figure S1. 1H-NMR Spectra of **L1-L3**

Figure S2. 1H-NMR Spectra of **1-3**

Figure S4. CD Spectra of **L1**-**L3** in acetonitrile

Figure S3. UV-Vis Spectra of **L1-L3** in acetonitrile
